# Supplementary material for: Suppressive Effects of Cooling Compounds Icilin on Penicillin G-Induced Epileptiform Discharges in Anesthetized Rats
Source: PubMed Central journal article supplement (PMC6585232; doi:10.3389/fphar.2019.00652), 2019-06-13
Supplement: Image_2.pdf [file Image_2.pdf]

Supplementary Figure S2.

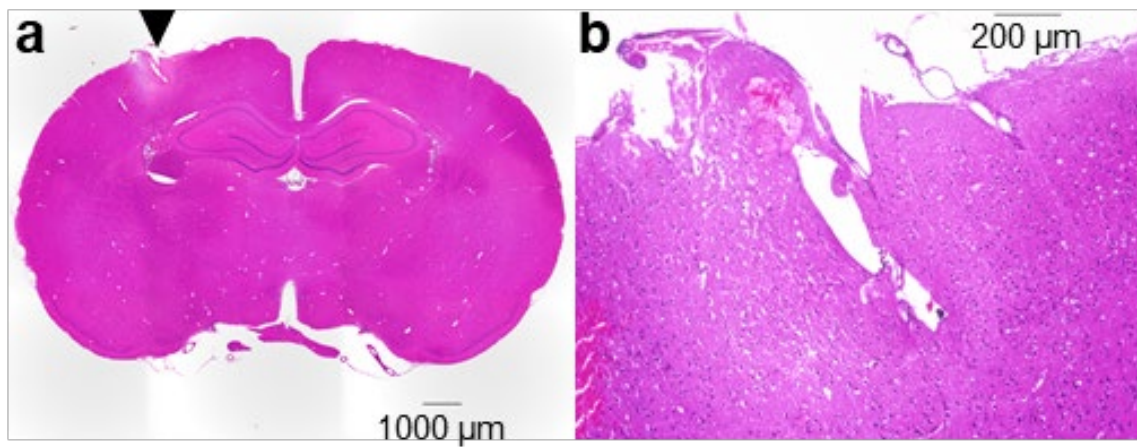

**Supplementary Figure S2.** (a) Photomicrographs of a coronal section from a rat in the PG + 3.0 mM icilin group acquired after the ECoG recording. The arrowhead shows the cannula injection location. Hematoxylin and eosin staining, scale bar = 1000 µm.

(b) Enlarged photomicrograph around the cannula injection location. Hematoxylin and eosin staining, scale bar = 100 µm.
