# Supplementary material for: Suppressive Effects of Cooling Compounds Icilin on Penicillin G-Induced Epileptiform Discharges in Anesthetized Rats
Source: PubMed Central journal article supplement (PMC6585232; doi:10.3389/fphar.2019.00652), 2019-06-13
Supplement: Image_3.pdf [file Image_3.pdf]

Supplementary Figure S3.

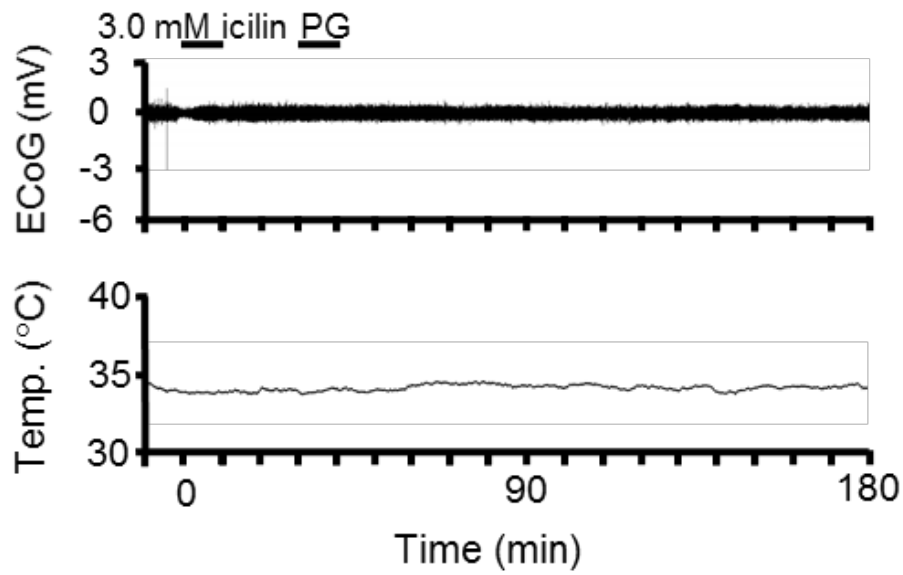

**Supplemental Figure S3.** Example of changes in ECoG and cortical temperature when 3.0 mM icilin was administered intracortically 30 min before PG injection. Each bar indicates the duration for intracortically administered 3.0 mM icilin and PG.
