# Supplementary material for: Suppressive Effects of Cooling Compounds Icilin on Penicillin G-Induced Epileptiform Discharges in Anesthetized Rats
Source: PubMed Central journal article supplement (PMC6585232; doi:10.3389/fphar.2019.00652), 2019-06-13

# Supplementary Figure S4

3.0 mM icilin PG

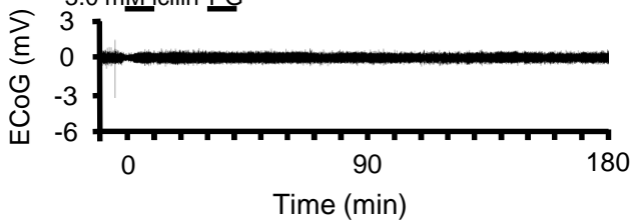

Supplement: Image_4.pdf [file Image_4.pdf]
